# Supplementary material for: A Chromosome-level Assembly of a Wild Castor Genome Provides New Insights into Adaptive Evolution in a Tropical Desert
Source: Research Square preprint supplement (doi:10.21203/rs.3.rs-84872/v1), 2020-10-27
Supplement: Supplementary file 1 [file 48524938d9759216150930c8.xlsx]

## Sheet: Sheet1
Supplementary Data 2 Identified potential genes associated with fatty acid metabolism(Blastp result,Pvalue cutoff 1e-5).
Protein ID	Gene ID	alignment_length	mismatches	gap_openings	q. start	q. end	s. start	s. end	e-value	Identities	bit_score	Subject Id	Annotation	Homolog gene in NSL4733
RcuChr01m0020	RcuChr01g0020	2516	1974	2150	57	115	115	121	9e-29	58/59	98	XP_002526503.1	acyl carrier protein 1, mitochondrial [Ricinus communis] EEF35894.1 acyl carrier protein, putative [Ricinus communis]	29709.m001206
RcuChr01m0211	RcuChr01g0211	1435	161	1195	1	345	345	716	0	344/345	99	XP_002511753.1	probable carboxylesterase 9 [Ricinus communis] EEF50422.1 Gibberellin receptor GID1, putative [Ricinus communis]	30174.m008922
RcuChr01m0212	RcuChr01g0212	1243	135	1139	28	362	362	671	0	334/335	99	XP_002511754.2	probable carboxylesterase 9 [Ricinus communis]	30174.m008923
RcuChr01m0224	RcuChr01g0224	4729	52	420	18	140	544	218	3e-91	123/123	100	XP_015584376.1	lysophospholipid acyltransferase LPEAT2 [Ricinus communis]	30174.m008937
RcuChr01m0267	RcuChr01g0267	3923	959	1591	1	185	470	374	1e-113	184/211	87	XP_002511814.1	digalactosyldiacylglycerol synthase 2, chloroplastic [Ricinus communis] XP_015584594.1 digalactosyldiacylglycerol synthase 2, chloroplastic [Ricinus communis] EEF50483.1 UDP-galactose:MGDG galactosyltransferase, putative [Ricinus communis]	30174.m008983
RcuChr01m0284	RcuChr01g0284	3951	2932	3948	384	722	722	547	2e-175	337/339	99	XP_002511830.1	acetyl-coenzyme A carboxylase carboxyl transferase subunit alpha, chloroplastic [Ricinus communis] EEF50499.1 acetyl-coenzyme A carboxylase carboxyl transferase alpha, putative [Ricinus communis]	30174.m008999
#RcuChr01m0321	RcuChr01g0321	3077	1856	2752	203	501	501	612	0	295/299	99	XP_002511873.1	probable glycerol-3-phosphate acyltransferase 8 [Ricinus communis] EEF50542.1 ER glycerol-phosphate acyltransferase [Ricinus communis]	30174.m008615
RcuChr01m0381	RcuChr01g0381	1903	359	1699	1	447	447	907	0	446/447	99	XP_002511936.1	delta(8)-fatty-acid desaturase 2 [Ricinus communis] EEF50605.1 fatty acid desaturase, putative [Ricinus communis]	30174.m008679
RcuChr01m0447	RcuChr01g0447	7858	1	255	1	85	722	180	1e-103	85/85	100	XP_002512007.1	probable acyl-activating enzyme 17, peroxisomal [Ricinus communis] EEF50676.1 acetyl-CoA synthetase, putative [Ricinus communis]	30174.m009035
#RcuChr01m0730	RcuChr01g0730	1705	797	1702	203	504	504	616	0	299/302	99	XP_002520171.1	glycerol-3-phosphate 2-O-acyltransferase 6 [Ricinus communis] EEF42226.1 ER glycerol-phosphate acyltransferase [Ricinus communis]	29736.m002070
RcuChr01m0805	RcuChr01g0805	927	1	924	1	308	308	642	0	308/308	100	XP_002531392.1	probable carboxylesterase 5 [Ricinus communis] EEF30976.1 Arylacetamide deacetylase, putative [Ricinus communis]	29168.m000369
RcuChr01m0907	RcuChr01g0907	7836	3923	4165	452	532	743	170	5e-115	80/81	99	XP_025014130.1	methylcrotonoyl-CoA carboxylase subunit alpha, mitochondrial isoform X1 [Ricinus communis]	29703.m001477
RcuChr01m1011	RcuChr01g1011	3017	9	410	1	134	293	222	7e-62	134/134	100	XP_002520734.1	fatty-acid-binding protein 1 [Ricinus communis] EEF41696.1 conserved hypothetical protein [Ricinus communis]	29647.m002076
RcuChr01m1219	RcuChr01g1219	4436	3327	3908	534	727	727	370	2e-169	194/194	100	XP_002515304.1	uncharacterized protein LOC8267364 isoform X1 [Ricinus communis] EEF47288.1 triacylglycerol lipase, putative [Ricinus communis]	30076.m004679
RcuChr01m1271	RcuChr01g1271	2238	923	1792	236	525	532	571	0	289/290	99	XP_015572336.1	probable glycerol-3-phosphate acyltransferase 3 [Ricinus communis]	30076.m004618
#RcuChr01m1275	RcuChr01g1275	19999	7174	7869	506	737	737	435	5e-143	232/232	100	XP_015572326.1	DUF724 domain-containing protein 7, partial [Ricinus communis]	30076.m004614	30076.m004615	30076.m004616
RcuChr01m1333	RcuChr01g1333	2754	949	1809	135	421	421	593	0	286/287	99	XP_002515188.1	acyl transferase 4 [Ricinus communis] EEF47172.1 10-deacetylbaccatin III 10-O-acetyltransferase, putative [Ricinus communis]	30076.m004560
RcuChr01m1554	RcuChr01g1554	3114	1	693	1	231	671	395	7e-121	230/231	99	EEF39083.1	triacylglycerol lipase, putative [Ricinus communis]	29742.m001439
#RcuChr01m1648	RcuChr01g1648	1943	1	498	14	120	321	132	1e-61	102/166	61	XP_015578266.1	lipid phosphate phosphatase 2 isoform X3 [Ricinus communis]	29747.m001075
RcuChr01m2894	RcuChr01g2894	5461	288	761	1	158	345	276	4e-79	158/158	100	XP_015579102.1	acyl-CoA-binding domain-containing protein 1 [Ricinus communis] EEF36122.1 acyl-coenzyme A binding domain containing, putative [Ricinus communis]	29753.m000252
RcuChr01m2929	RcuChr01g2929	7666	487	687	40	106	400	143	8e-48	67/67	100	XP_002521933.1	uncharacterized protein LOC8268176 [Ricinus communis] EEF40457.1 carboxylesterase np, putative [Ricinus communis]	29700.m000762
#RcuChr01m3186	RcuChr01g3186	3124	1081	2202	1	319	319	622	0	313/374	84	XP_002526043.3	uncharacterized protein LOC8258215 isoform X1 [Ricinus communis] EEF36320.1 Phospholipase A22 [Ricinus communis]	30142.m000631
#RcuChr01m3536	RcuChr01g3536	3603	1004	1591	208	332	506	218	2e-134	120/196	61	EEF36775.1	Omega-3 fatty acid desaturase, endoplasmic reticulum, putative [Ricinus communis]	29681.m001360
RcuChr02m0027	RcuChr02g0027	1664	892	1263	117	244	282	206	1e-91	107/129	83	XP_012073539.1	diacylglycerol kinase theta [Jatropha curcas] KDP36722.1 hypothetical protein JCGZ_08013 [Jatropha curcas]	30170.m013726
RcuChr02m0101	RcuChr02g0101	2929	1314	2768	89	573	573	1009	0	485/485	100	XP_002510668.2	probable acyl-activating enzyme 1, peroxisomal [Ricinus communis]	30170.m014355	31948.m000033	39127.m000026
RcuChr02m0278	RcuChr02g0278	3666	296	541	72	153	413	171	6e-52	80/82	98	XP_002510485.1	probable 1-acylglycerol-3-phosphate O-acyltransferase [Ricinus communis] EEF52672.1 abhydrolase domain containing, putative [Ricinus communis]	30170.m014138
#RcuChr02m0417	RcuChr02g0417	4995	302	802	1	167	382	343	2e-102	167/167	100	XP_002510350.1	lysophospholipid acyltransferase LPEAT1 isoform X3 [Ricinus communis] EEF52537.1 acyltransferase, putative [Ricinus communis]	30170.m014002
#RcuChr02m0428	RcuChr02g0428	4516	1053	1928	1	233	379	432	4e-135	226/292	77	NP_001310629.1	probable 1-acyl-sn-glycerol-3-phosphate acyltransferase 4 [Ricinus communis] XP_015572804.1 probable 1-acyl-sn-glycerol-3-phosphate acyltransferase 4 isoform X1 [Ricinus communis] ACC59199.1 1-acyl-sn-glycerol-3-phosphate acyltransferase [Ricinus communis] AJP36330.1 lysophosphatidic acid acyltransferase 4 [Ricinus communis]	30170.m013990
RcuChr02m0429	RcuChr02g0429	1595	1284	379	1	302	302	525	0	302/302	100	XP_002510338.1	elongation of fatty acids protein 3-like [Ricinus communis] EEF52525.1 conserved hypothetical protein [Ricinus communis]
RcuChr02m0508	RcuChr02g0508	951	1	948	1	320	320	504	4e-178	241/320	75	XP_021666468.1	probable carboxylesterase 2 [Hevea brasiliensis]	30170.m013909
RcuChr02m0548	RcuChr02g0548	3908	2591	3301	180	418	470	434	5e-136	213/239	89	NP_001310678.1	uncharacterized LOC8278856 [Ricinus communis] EEF52390.1 triacylglycerol lipase, putative [Ricinus communis] AFQ93687.1 triacylglycerol acidic lipase TAL5 [Ricinus communis]	30170.m013862
RcuChr02m0631	RcuChr02g0631	3934	186	935	1	250	339	438	2e-139	250/250	100	XP_015575893.1	acyl-CoA-binding domain-containing protein 3 [Ricinus communis]	30170.m013760
RcuChr02m0919	RcuChr02g0919	3061	1476	2231	96	347	526	430	3e-136	249/252	99	XP_002513907.1	putative glycerol-3-phosphate transporter 3 [Ricinus communis] EEF48490.1 carbohydrate transporter, putative [Ricinus communis]	29908.m006017
#RcuChr02m0944	RcuChr02g0944	14145	11465	13759	1524	2259	2259	1467	0	734/765	96	XP_002513881.1	acetyl-CoA carboxylase 1 [Ricinus communis] EEF48464.1 Homomeric Acetyl-CoA Carboxylase (Hom-ACCase) [Ricinus communis]	29908.m005991
RcuChr02m0963	RcuChr02g0963	2811	1843	2808	221	543	543	560	0	299/323	93	XP_002513857.1	probable glycerol-3-phosphate acyltransferase 3 [Ricinus communis] EEF48440.1 Glycerol-3-phosphate acyltransferase, putative [Ricinus communis]	29908.m005967
RcuChr02m1006	RcuChr02g1006	4500	1	630	1	180	697	325	2e-92	176/210	84	XP_015571498.1	long chain acyl-CoA synthetase 9, chloroplastic [Ricinus communis] EEF48390.1 long-chain-fatty-acid CoA ligase, putative [Ricinus communis]	29908.m006186
#RcuChr02m1181	RcuChr02g1181	1686	990	1553	204	391	391	393	0	187/188	99	NP_001310674.1	stearoyl-[acyl-carrier-protein] 9-desaturase 6, chloroplastic [Ricinus communis] ACG59947.1 stearoyl-acyl-carrier protein desaturase [Ricinus communis] ACG59948.1 stearoyl-acyl-carrier protein desaturase [Ricinus communis] EEF36239.1 stearoyl-ACP desaturase [Ricinus communis]	27985.m000877
RcuChr02m1521	RcuChr02g1521	1574	133	1251	1	373	373	687	0	373/373	100	XP_002523490.2	probable carboxylesterase 18 [Ricinus communis]	29910.m000966
RcuChr02m1556	RcuChr02g1556	1083	1	987	1	329	329	679	0	328/329	99	XP_002523451.1	probable carboxylesterase 18 [Ricinus communis] EEF38910.1 Acetyl esterase, putative [Ricinus communis]	29910.m000927
#RcuChr02m2249	RcuChr02g2249	6825	4089	3421	205	427	696	195	4e-105	110/225	49	PWA86467.1	gag/pol polyprotein [Artemisia annua]	30113.m001448
#RcuChr02m2368	RcuChr02g2368	5965	235	924	1	154	237	213	6e-163	153/230	82	XP_002524166.1	malonyl-CoA-acyl carrier protein transacylase, mitochondrial [Jatropha curcas] EEF38229.1 hydroxyacyl-ACP Dehydrase [Ricinus communis]	30200.m000354	55600.m000024
#RcuChr02m2615	RcuChr02g2615	11321	358	696	23	135	541	231	6e-87	113/113	100	XP_002519811.1	biotin carboxylase 2, chloroplastic [Ricinus communis] EEF42607.1 Biotin caboxylase subunit (BC) of Het-ACCase [Ricinus communis]	30185.m000954
RcuChr02m2681	RcuChr02g2681	1427	411	1424	131	468	468	683	0	326/338	96	AAY16731.1	ribulose-1,5-bisphosphate carboxylase/oxygenase large subunit, partial (chloroplast) [Ricinus communis]
RcuChr02m2682	RcuChr02g2682	588	1	567	39	227	274	357	6e-123	173/189	92	EEF27141.1	carboxyl-tansferase, subunit of Het-ACCase, partial [Ricinus communis]
RcuChr03m0496	RcuChr03g0496	506	1	282	59	156	363	128	3e-55	63/98	64	XP_012086297.2	probable carboxylesterase 1 [Jatropha curcas]
RcuChr03m0992	RcuChr03g0992	8584	236	595	1	120	484	241	3e-65	118/120	98	XP_002531747.1	diacylglycerol kinase 4 [Ricinus communis] EEF30636.1 diacylglycerol kinase, alpha, putative [Ricinus communis]	29749.m000143
RcuChr03m1027	RcuChr03g1027	654	1	651	34	250	263	404	3e-141	195/217	90	AKG48975.1	ribulose-1,5-bisphosphate carboxylase/oxygenase large subunit, partial (chloroplast) [Hypericum setosum]
RcuChr03m1113	RcuChr03g1113	5465	4239	4907	55	236	307	334	5e-100	172/223	77	XP_015580990.1	1-acyl-sn-glycerol-3-phosphate acyltransferase 1, chloroplastic isoform X3 [Ricinus communis] XP_025014924.1 1-acyl-sn-glycerol-3-phosphate acyltransferase 1, chloroplastic isoform X3 [Ricinus communis]	29687.m000572	29687.m000573
RcuChr03m1132	RcuChr03g1132	5445	2962	3423	211	311	441	181	3e-45	93/154	60	XP_021615479.1	omega-6 fatty acid desaturase, chloroplastic [Manihot esculenta] OAY46898.1 hypothetical protein MANES_06G036500 [Manihot esculenta]	29696.m000105
RcuChr03m1392	RcuChr03g1392	2823	1837	2025	108	170	258	105	8e-32	53/63	84	XP_002524444.1	acyl-protein thioesterase 2 [Ricinus communis] XP_015578035.1 acyl-protein thioesterase 2 [Ricinus communis] EEF37884.1 Acyl-protein thioesterase, putative [Ricinus communis]	28320.m001083
RcuChr03m1508	RcuChr03g1508	7326	1573	1884	162	265	724	181	7e-43	102/104	98	XP_002514279.1	peroxisomal fatty acid beta-oxidation multifunctional protein AIM1 [Ricinus communis] EEF48233.1 3-hydroxyacyl-CoA dehyrogenase, putative [Ricinus communis]	29912.m005496
#RcuChr03m1607	RcuChr03g1607	2826	78	242	1	55	65	118	3e-28	54/55	98	EEF48117.1	conserved hypothetical protein [Ricinus communis]	29912.m005406
#RcuChr03m1635	RcuChr03g1635	6912	1	378	1	126	521	199	1e-50	126/126	100	NP_001310663.1	diacylglycerol O-acyltransferase 1 [Ricinus communis] AAR11479.1 diacylglycerol acyltransferase [Ricinus communis] ACB30543.1 diacylglycerol acyltransferase type-1 [Ricinus communis] EEF48086.1 type 1 diacylglycerol acyltransferase [Ricinus communis]	29912.m005373
#RcuChr03m1693	RcuChr03g1693	5956	4936	5418	500	660	660	334	4e-95	161/161	100	NP_001310662.1	phospholipid:diacylglycerol acyltransferase 1 [Ricinus communis] AEJ32006.1 phospholipid:diacylglycerol acyltransferase 1-2 [Ricinus communis]	29912.m005286
#RcuChr03m1769	RcuChr03g1769	5279	1333	1548	124	195	493	130	8e-56	63/72	88	PNT31572.1	hypothetical protein POPTR_006G138000v3 [Populus trichocarpa]	29739.m003711	39251.m000023
RcuChr03m1824	RcuChr03g1824	2316	155	604	1	150	241	207	3e-58	150/150	100	XP_002516175.1	protein FATTY ACID EXPORT 2, chloroplastic [Ricinus communis] EEF46177.1 transmembrane protein 14, putative [Ricinus communis]	29739.m003658
#RcuChr03m1828	RcuChr03g1828	1015	1	297	1	68	156	127	3e-61	68/99	69	XP_015572879.1	acyl carrier protein, chloroplastic isoform X1 [Ricinus communis]	29739.m003654
RcuChr03m1922	RcuChr03g1922	4881	382	1722	1	447	447	909	0	447/447	100	EEF45771.1	fatty acid desaturase, putative [Ricinus communis]	29794.m003308
RcuChr03m1974	RcuChr03g1974	786	3	593	36	232	232	366	5e-126	197/197	100	EEF45834.1	Oleosin, putative [Ricinus communis]	29794.m003372
#RcuChr03m2124	RcuChr03g2124	4617	49	501	17	167	419	286	9e-97	151/151	100	NP_001310677.1	palmitoyl-acyl carrier protein thioesterase, chloroplastic [Ricinus communis] XP_025012466.1 palmitoyl-acyl carrier protein thioesterase, chloroplastic isoform X1 [Ricinus communis] ABV54795.1 acyl-ACP thioesterase [Ricinus communis] EEF47013.1 palmitoyl-acyl carrier protein thioesterase [Ricinus communis]	29848.m004677
RcuChr03m2141	RcuChr03g2141	5506	3859	4206	120	198	255	142	1e-33	78/116	67	XP_002515548.1	acyl-protein thioesterase 2 [Ricinus communis] XP_015572465.1 acyl-protein thioesterase 2 [Ricinus communis] XP_015572466.1 acyl-protein thioesterase 2 [Ricinus communis] EEF46997.1 Acyl-protein thioesterase, putative [Ricinus communis]	29848.m004661
#RcuChr04m0858	RcuChr04g0858	3915	536	742	60	119	160	97.8	5e-34	46/69	67	XP_002523659.1	phospholipase A2-alpha [Ricinus communis] EEF38745.1 Phospholipase A21 [Ricinus communis]	29840.m000629
RcuChr04m1193	RcuChr04g1193	4603	2264	2488	40	114	237	102	1e-33	45/75	60	EOY25526.1	Fatty acid hydroxylase 1 isoform 1 [Theobroma cacao] EOY25527.1 Fatty acid hydroxylase 1 isoform 1 [Theobroma cacao]	30075.m001158
#RcuChr04m1293	RcuChr04g1293	1662	1	1098	1	266	397	501	6e-172	266/366	73	XP_002526311.1	palmitoyl-acyl carrier protein thioesterase, chloroplastic [Ricinus communis] EEF36100.1 palmitoyl-acyl carrier protein thioesterase [Ricinus communis]	29660.m000782
RcuChr04m1294	RcuChr04g1294	11815	11143	10046	1	266	397	503	6e-157	266/366	73	XP_002526311.1	palmitoyl-acyl carrier protein thioesterase, chloroplastic [Ricinus communis] EEF36100.1 palmitoyl-acyl carrier protein thioesterase [Ricinus communis]	29660.m000781
#RcuChr04m1310	RcuChr04g1310	10692	7813	4481	546	1652	1808	945	0	537/1138	47	XP_024044151.1	uncharacterized protein LOC18046468 isoform X1 [Citrus clementina]	29660.m000760
#RcuChr04m1311	RcuChr04g1311	2113	67	300	19	96	311	164	4e-67	77/78	99	XP_015579110.2	lipid phosphate phosphatase 1 [Ricinus communis] EEF36077.1 phosphatidic acid phosphatase, putative [Ricinus communis]	29660.m000759
RcuChr04m1319	RcuChr04g1319	3080	1300	1659	1	120	212	238	1e-68	115/120	96	XP_002526282.1	phosphopantothenoylcysteine decarboxylase [Ricinus communis] XP_015579109.1 phosphopantothenoylcysteine decarboxylase [Ricinus communis] EEF36071.1 phosphopentothenoylcysteine decarboxylase, putative [Ricinus communis]	29660.m000753	32058.m000015
RcuChr04m1372	RcuChr04g1372	856	623	853	104	180	180	168	2e-48	76/77	99	XP_002531624.1	ribulose bisphosphate carboxylase small chain, chloroplastic [Ricinus communis] EEF30752.1 Ribulose bisphosphate carboxylase small chain, chloroplast precursor, putative [Ricinus communis]	27524.m000290
RcuChr04m1378	RcuChr04g1378	2256	103	1590	1	488	488	998	0	485/496	98	EEF30758.1	acyltransferase, putative [Ricinus communis]	27524.m000296
RcuChr04m1406	RcuChr04g1406	1664	220	1287	1	356	356	714	0	356/356	100	XP_002529140.1	probable carboxylesterase 6 [Ricinus communis] EEF33253.1 catalytic, putative [Ricinus communis]	28883.m000736
#RcuChr04m1476	RcuChr04g1476	7627	1272	1373	119	152	152	69.7	5e-29	30/34	88	XP_010502430.1	PREDICTED: choline/ethanolaminephosphotransferase 2-like [Camelina sativa]	30138.m003845
RcuChr04m1915	RcuChr04g1915	493	57	479	1	141	141	205	3e-65	141/141	100	XP_002511342.1	oleosin 18.2 kDa [Ricinus communis] EEF51944.1 Oleosin 18.2 kDa, putative [Ricinus communis]	30147.m013891
#RcuChr04m2022	RcuChr04g2022	3117	1	543	1	118	315	177	9e-46	107/181	59	XP_002511229.1	3-oxoacyl-[acyl-carrier-protein] reductase 4 [Ricinus communis] EEF51831.1 short chain type dehydrogenase, putative [Ricinus communis]	29029.m000079	29129.m000032	30147.m013777	34013.m000023	35411.m000026	36270.m000024	43638.m000025	44743.m000014	46073.m000014	50853.m000025	57459.m000014
#RcuChr04m2092	RcuChr04g2092	1961	124	789	1	194	395	400	6e-131	194/222	87	XP_002511148.2	palmitoyl-acyl carrier protein thioesterase, chloroplastic [Ricinus communis]	30147.m014468
#RcuChr04m2136	RcuChr04g2136	2093	1179	1532	50	137	137	112	3e-37	83/118	70	XP_002511107.1	acyl carrier protein 4, chloroplastic [Ricinus communis] EEF51709.1 acyl carrier protein, putative [Ricinus communis]	30147.m014425
#RcuChr04m2216	RcuChr04g2216	495	1	492	1	138	138	219	5e-71	138/164	84	XP_002511014.1	oleosin 1 [Ricinus communis] AAR15172.1 oleosin [Ricinus communis] EEF51616.1 Oleosin 2 [Ricinus communis]	30147.m014333
RcuChr04m2275	RcuChr04g2275	4182	993	2144	1	384	563	782	0	378/384	98	EEF51553.1	Glycerol-3-phosphate transporter, putative [Ricinus communis]	29619.m000248	30147.m014220
RcuChr04m2339	RcuChr04g2339	1498	2	1393	19	482	482	922	0	463/464	99	EEF51487.1	acyltransferase, putative [Ricinus communis]	30147.m014153
RcuChr04m2349	RcuChr04g2349	2133	1	975	1	325	325	674	0	325/325	100	XP_002510875.1	carboxylesterase 1 [Ricinus communis] EEF51477.1 Gibberellin receptor GID1, putative [Ricinus communis]	30147.m014142
RcuChr04m2350	RcuChr04g2350	1463	248	1249	1	334	335	691	0	333/334	99	XP_002510874.1	carboxylesterase 1 [Ricinus communis] EEF51476.1 Gibberellin receptor GID1, putative [Ricinus communis]	30147.m014141
RcuChr04m2611	RcuChr04g2611	408	383	3	1	127	561	179	6e-51	127/127	100	XP_002513507.1	dicarboxylate transporter 1, chloroplastic [Ricinus communis] EEF48910.1 2-oxoglutarate/malate translocator, chloroplast precursor, putative [Ricinus communis]
RcuChr04m2612	RcuChr04g2612	10866	1	660	149	368	561	374	6e-110	220/220	100	XP_002513507.1	dicarboxylate transporter 1, chloroplastic [Ricinus communis] EEF48910.1 2-oxoglutarate/malate translocator, chloroplast precursor, putative [Ricinus communis]	30169.m006452	30169.m006453
#RcuChr04m2632	RcuChr04g2632	8164	7955	8161	308	376	376	138	7e-78	69/69	100	XP_002513486.1	1-acyl-sn-glycerol-3-phosphate acyltransferase 2 isoform X1 [Ricinus communis] EEF48889.1 1-acylglycerol-3-phosphate acyltransferase, putative [Ricinus communis]	30169.m006432	30169.m006432	30169.m006433	30169.m006433
RcuChr04m2752	RcuChr04g2752	2511	1031	1513	1	134	149	216	2e-62	123/161	76	XP_018854824.1	PREDICTED: peroxisomal 2,4-dienoyl-CoA reductase [Juglans regia]	30169.m006302
RcuChr05m0001	RcuChr05g0001	9787	7542	8525	413	740	965	621	0	313/328	95	NP_001310696.1	phosphoenolpyruvate carboxylase 2 [Ricinus communis] ABR29878.1 phosphoenolpyruvate carboxylase [Ricinus communis]
#RcuChr05m0358	RcuChr05g0358	4260	1598	1972	129	221	340	172	2e-43	89/125	71	ABI83668.1	type 2 acyl-CoA diacylglycerol acyltransferase [Ricinus communis]	29682.m000581
#RcuChr05m0381	RcuChr05g0381	2334	1156	2037	244	537	537	575	0	292/294	99	XP_002534072.1	glycerol-3-phosphate acyltransferase 1 [Ricinus communis] EEF28316.1 ER glycerol-phosphate acyltransferase [Ricinus communis]	28350.m000105
#RcuChr05m0394	RcuChr05g0394	6730	3306	3527	53	126	384	109	1e-67	60/74	81	XP_021603701.1	lipid phosphate phosphatase 2-like isoform X2 [Manihot esculenta]	29586.m000620
RcuChr05m0724	RcuChr05g0724	19030	1260	1520	139	198	405	108	3e-67	58/87	67	XP_025015155.1	3-hydroxyisobutyryl-CoA hydrolase-like protein 1, mitochondrial isoform X1 [Ricinus communis] XP_025015156.1 3-hydroxyisobutyryl-CoA hydrolase-like protein 1, mitochondrial isoform X1 [Ricinus communis]	30101.m000373	30101.m000375
RcuChr05m0769	RcuChr05g0769	3456	1	246	1	82	333	162	5e-66	78/82	95	XP_015582808.1	probable enoyl-CoA hydratase 2, mitochondrial isoform X1 [Ricinus communis]	28192.m000249	44442.m000024	47995.m000013
RcuChr05m0791	RcuChr05g0791	5838	299	1321	1	341	535	706	0	341/341	100	XP_015582460.1	putative glycerol-3-phosphate transporter 4 [Ricinus communis]	28193.m000305
RcuChr05m0830	RcuChr05g0830	1784	963	1781	19	290	290	548	0	265/273	97	EEF26259.1	acyltransferase, putative, partial [Ricinus communis]	33107.m000017
#RcuChr05m0939	RcuChr05g0939	2403	1074	1412	100	212	260	160	3e-66	103/113	91	XP_002526099.1	biotin carboxyl carrier protein of acetyl-CoA carboxylase 2, chloroplastic [Ricinus communis] EEF36293.1 Biotin carboxyl carrier protein subunit of of Het-ACCase (BCCP2) [Ricinus communis]	28859.m000332	29630.m000809
RcuChr05m0976	RcuChr05g0976	1425	1	1422	1	474	474	983	0	474/474	100	XP_002527623.1	malonyl-CoA:anthocyanidin 5-O-glucoside-6''-O-malonyltransferase [Ricinus communis] EEF34762.1 Anthocyanin 5-aromatic acyltransferase, putative [Ricinus communis]	29905.m000436
RcuChr05m1087	RcuChr05g1087	5453	1184	2647	1	488	488	971	0	488/488	100	XP_002530803.1	6-phosphogluconate dehydrogenase, decarboxylating 3 [Ricinus communis] EEF31571.1 6-phosphogluconate dehydrogenase, putative [Ricinus communis]	29832.m000313
#RcuChr05m1305	RcuChr05g1305	7583	2953	3564	317	446	678	151	0	91/204	97	XP_015574567.1	long chain acyl-CoA synthetase 2 [Ricinus communis]	29851.m002473
#RcuChr05m1325	RcuChr05g1325	4172	2015	2905	1	250	331	459	6e-147	238/301	79	XP_025013074.1	probable 1-acyl-sn-glycerol-3-phosphate acyltransferase 5 isoform X4 [Ricinus communis]	29851.m002448
#RcuChr05m1448	RcuChr05g1448	462	1	459	1	153	153	268	4e-90	153/153	100	XP_002521458.1	oleosin 18.2 kDa [Ricinus communis] AAR15171.1 oleosin [Ricinus communis] EEF40948.1 Oleosin1 [Ricinus communis]	29917.m001992
RcuChr05m1470	RcuChr05g1470	1275	632	1054	113	224	268	209	1e-73	112/141	79	XP_002521478.1	fatty-acid-binding protein 1 [Ricinus communis] EEF40968.1 conserved hypothetical protein [Ricinus communis]	29917.m002012
RcuChr05m1503	RcuChr05g1503	3743	1246	1659	145	255	416	217	1e-75	111/138	80	XP_002526956.2	glycerol-3-phosphate dehydrogenase [NAD(+)] isoform X3 [Ricinus communis]	29633.m000917
RcuChr05m1530	RcuChr05g1530	4776	449	1339	1	297	472	503	8e-160	294/297	99	XP_002526925.1	probable carboxylesterase 11 [Ricinus communis] EEF35412.1 conserved hypothetical protein [Ricinus communis]	29633.m000885
#RcuChr05m1549	RcuChr05g1549	8093	7855	6488	1	456	456	924	0	456/456	100	XP_002529790.1	probable xyloglucan galactosyltransferase GT19 [Ricinus communis] EEF32604.1 catalytic, putative [Ricinus communis]	28455.m000368	36472.m000022
RcuChr05m1733	RcuChr05g1733	1241	33	1058	1	342	342	712	0	342/342	100	XP_002516731.1	probable carboxylesterase 17 [Ricinus communis] EEF45629.1 Lipase, putative [Ricinus communis]	30205.m001585
#RcuChr05m2103	RcuChr05g2103	13423	8230	8466	497	575	769	154	1e-127	70/79	89	XP_002519706.1	DNA replication licensing factor MCM3 [Ricinus communis] XP_015575017.1 DNA replication licensing factor MCM3 [Ricinus communis] EEF42679.1 DNA replication licensing factor MCM3, putative [Ricinus communis]	29693.m002032	29693.m002033	29693.m002034
RcuChr05m2136	RcuChr05g2136	9731	2044	2397	221	338	446	244	2e-66	117/118	99	XP_015574943.1	carboxyl-terminal-processing peptidase 1, chloroplastic isoform X3 [Ricinus communis]	29693.m002070	29693.m002071
RcuChr05m2485	RcuChr05g2485	3154	2792	3151	427	515	515	154	2e-105	82/120	68	XP_021653214.1	ribulose-1,5 bisphosphate carboxylase/oxygenase large subunit N-methyltransferase, chloroplastic-like [Hevea brasiliensis] XP_021653215.1 ribulose-1,5 bisphosphate carboxylase/oxygenase large subunit N-methyltransferase, chloroplastic-like [Hevea brasiliensis] XP_021653216.1 ribulose-1,5 bisphosphate carboxylase/oxygenase large subunit N-methyltransferase, chloroplastic-like [Hevea brasiliensis]	30190.m010973	30190.m010973
#RcuChr05m2839	RcuChr05g2839	6920	5056	5319	416	503	665	181	1e-94	84/88	95	NP_001310699.1	long chain acyl-CoA synthetase 4 [Ricinus communis] ACB30545.1 long-chain acyl-CoA synthetase 4 [Ricinus communis]	30190.m010831
#RcuChr05m2874	RcuChr05g2874	3098	927	1820	51	316	489	503	0	244/298	82	XP_012086687.1	3-oxoacyl-[acyl-carrier-protein] synthase I, chloroplastic [Jatropha curcas] KDP25270.1 hypothetical protein JCGZ_20426 [Jatropha curcas]	30068.m002515
#RcuChr05m2996	RcuChr05g2996	11948	4887	5147	215	270	455	104	5e-36	56/87	64	XP_002518993.1	glycerol-3-phosphate acyltransferase, chloroplastic isoform X1 [Ricinus communis] XP_015574485.1 glycerol-3-phosphate acyltransferase, chloroplastic isoform X1 [Ricinus communis] EEF43526.1 plastidial glycerol-phosphate acyltransferase [Ricinus communis]	30068.m002660
#RcuChr05m3085	RcuChr05g3085	2080	1272	1517	45	116	116	93.2	1e-33	51/82	62	PNT44802.1	hypothetical protein POPTR_003G103700v3 [Populus trichocarpa]	29827.m002594
RcuChr05m3131	RcuChr05g3131	3953	3109	3609	131	297	297	302	1e-89	167/167	100	XP_002519821.1	mitochondrial carnitine/acylcarnitine carrier-like protein [Ricinus communis] EEF42425.1 Protein dif-1, putative [Ricinus communis]	29827.m002535
#RcuChr05m3284	RcuChr05g3284	3611	2125	3024	213	512	512	589	0	298/300	99	XP_002517438.1	glycerol-3-phosphate 2-O-acyltransferase 6 [Ricinus communis] EEF44980.1 ER glycerol-phosphate acyltransferase [Ricinus communis]	29822.m003441
RcuChr05m3341	RcuChr05g3341	180	1	162	1	54	56	92.8	1e-23	45/54	83	AAO43811.1	ribulose-1,5-bisphosphate carboxylase/oxygenase large subunit, partial (chloroplast) [Penaea cneorum subsp. cneorum] AAO43815.1 ribulose-1,5-bisphosphate carboxylase/oxygenase large subunit, partial (chloroplast) [Penaea cneorum subsp. cf. ruscifolia Schoenenberger 368]
#RcuChr05m3541	RcuChr05g3541	7044	1497	2294	51	257	1072	381	0	207/266	78	XP_015574263.1	phospholipase A I isoform X2 [Ricinus communis]	29842.m003623
RcuChr05m3618	RcuChr05g3618	5269	782	991	140	209	549	130	2e-88	65/70	93	XP_002518428.2	malonyl-CoA decarboxylase, mitochondrial [Ricinus communis]	29842.m003539
RcuChr05m3638	RcuChr05g3638	2120	1278	1628	104	186	250	148	1e-36	80/117	68	XP_002518404.1	probable carboxylesterase SOBER1-like [Ricinus communis] EEF43791.1 acyl-protein thioesterase 1,2, putative [Ricinus communis]	29842.m003515
RcuChr06m0979	RcuChr06g0979	2001	356	1747	1	464	464	917	0	464/464	100	XP_002513167.1	malonyl-coenzyme A:anthocyanin 3-O-glucoside-6''-O-malonyltransferase [Ricinus communis] EEF49158.1 Anthocyanin 5-aromatic acyltransferase, putative [Ricinus communis]	30152.m002385
RcuChr06m1126	RcuChr06g1126	2706	1603	2703	1	367	367	581	0	367/367	100	XP_002527949.1	acyl-CoA--sterol O-acyltransferase 1 [Ricinus communis] EEF34438.1 acyltransferase, putative [Ricinus communis]	29990.m000512
RcuChr06m1127	RcuChr06g1127	1840	562	1674	3	372	376	506	3e-173	277/384	72	XP_021688404.1	acyl-CoA--sterol O-acyltransferase 1-like [Hevea brasiliensis]	29990.m000511	29990.m000511
RcuChr06m1128	RcuChr06g1128	6572	233	1315	1	361	361	664	0	361/361	100	XP_015580109.1	acyl-CoA--sterol O-acyltransferase 1 [Ricinus communis]	29990.m000510
RcuChr06m1168	RcuChr06g1168	1768	228	1073	1	282	282	460	3e-157	221/283	78	XP_021659711.1	putative elongation of fatty acids protein DDB_G0272012 [Hevea brasiliensis]
RcuChr06m1170	RcuChr06g1170	1437	320	1126	1	269	269	542	0	269/269	100	XP_015582233.1	elongation of fatty acids protein 3-like [Ricinus communis]	27732.m000273	27732.m000273
RcuChr06m1546	RcuChr06g1546	7312	2051	2503	84	204	607	208	1e-52	109/151	72	XP_002518319.1	fatty acid amide hydrolase [Ricinus communis] EEF44079.1 glutamyl-tRNA(gln) amidotransferase subunit A, putative [Ricinus communis]	28506.m000054	29804.m001523	33669.m000015
RcuChr06m1560	RcuChr06g1560	8087	935	1108	75	132	545	102	7e-37	47/58	81	XP_002518303.1	probable protein S-acyltransferase 23 isoform X1 [Ricinus communis] EEF44063.1 Palmitoyltransferase TIP1, putative [Ricinus communis]	29804.m001506
RcuChr06m1690	RcuChr06g1690	1281	137	1243	1	369	369	659	0	367/369	99	XP_002532421.1	acyl-CoA--sterol O-acyltransferase 1 [Ricinus communis] EEF29962.1 acyltransferase, putative [Ricinus communis]	29812.m000198
RcuChr06m1691	RcuChr06g1691	599	1	537	176	354	354	371	3e-127	179/179	100	EEF29961.1	acyltransferase, putative [Ricinus communis]	29812.m000197
RcuChr06m1768	RcuChr06g1768	5033	3390	3701	297	400	400	217	6e-58	103/104	99	XP_002518667.1	triacylglycerol lipase 1 [Ricinus communis] EEF43592.1 Triacylglycerol lipase 1 precursor, putative [Ricinus communis]	29801.m003086
RcuChr06m1804	RcuChr06g1804	1784	267	1517	1	417	417	777	0	417/417	100	XP_002518706.1	phospholipase A1-IIdelta [Ricinus communis] EEF43631.1 triacylglycerol lipase, putative [Ricinus communis]	29801.m003125	30206.m000788
RcuChr06m1846	RcuChr06g1846	4661	1339	1770	117	260	543	303	5e-86	144/144	100	EEF43680.1	Methylcrotonoyl-CoA carboxylase beta chain, mitochondrial precursor, putative [Ricinus communis]	29801.m003174
RcuChr06m1878	RcuChr06g1878	969	1	963	1	321	328	671	0	321/321	100	XP_002518790.1	probable carboxylesterase 12 [Ricinus communis] EEF43715.1 Gibberellin receptor GID1, putative [Ricinus communis]	29801.m003209
RcuChr06m1880	RcuChr06g1880	1591	275	1369	22	386	386	686	0	365/365	100	XP_002518792.3	probable carboxylesterase 12 [Ricinus communis]	29801.m003211
RcuChr06m1935	RcuChr06g1935	3650	615	1256	90	228	410	256	4e-72	138/214	64	XP_002520875.1	glycerol-3-phosphate dehydrogenase [NAD(+)] 2, chloroplastic isoform X1 [Ricinus communis] EEF41584.1 glycerol-3-phosphate dehydrogenase, putative [Ricinus communis]	29729.m002373
RcuChr06m2062	RcuChr06g2062	2294	1	534	1	178	460	307	6e-93	178/178	100	NP_001310643.1	omega-3 fatty acid desaturase, chloroplastic [Ricinus communis] P48619.1 RecName: Full=Omega-3 fatty acid desaturase, chloroplastic; Flags: Precursor AAA73511.1 linoleoyl desaturase [Ricinus communis] EEF34057.1 Omega-3 fatty acid desaturase, chloroplast precursor [Ricinus communis]	29814.m000719
RcuChr06m2212	RcuChr06g2212	3412	1609	2241	163	341	473	359	3e-164	178/211	84	XP_002524206.1	ribulose bisphosphate carboxylase/oxygenase activase 2, chloroplastic isoform X1 [Ricinus communis] EEF38130.1 Ribulose bisphosphate carboxylase/oxygenase activase 1, chloroplast precursor, putative [Ricinus communis]	30143.m001170
#RcuChr06m2220	RcuChr06g2220	1783	149	1780	3	493	493	759	0	414/544	76	XP_012088851.1	glycerol-3-phosphate acyltransferase 5 [Jatropha curcas] KDP44927.1 hypothetical protein JCGZ_01427 [Jatropha curcas]	27568.m000266
RcuChr06m2261	RcuChr06g2261	4626	1845	2603	37	289	310	484	8e-156	251/253	99	XP_002530850.1	very-long-chain enoyl-CoA reductase [Ricinus communis] EEF31524.1 Synaptic glycoprotein SC2, putative [Ricinus communis]	30003.m000326
RcuChr06m2294	RcuChr06g2294	903	1	720	1	240	240	444	3e-156	237/240	99	XP_002528449.1	enoyl-CoA delta isomerase 1, peroxisomal [Ricinus communis] EEF33932.1 carnitine racemase, putative [Ricinus communis]	29585.m000591
RcuChr06m2396	RcuChr06g2396	9024	3112	3486	144	241	522	181	3e-44	92/125	74	XP_015582991.1	acyl-CoA-binding domain-containing protein 4 [Ricinus communis]	28872.m000245
RcuChr06m2449	RcuChr06g2449	6571	1036	1524	124	286	631	301	3e-84	160/163	98	XP_002529602.1	glycerol-3-phosphate dehydrogenase SDP6, mitochondrial [Ricinus communis] EEF32794.1 glycerol-3-phosphate dehydrogenase, putative [Ricinus communis]	29745.m000373	29745.m000373	30570.m000018
RcuChr06m2614	RcuChr06g2614	3162	74	634	1	187	359	155	2e-37	184/187	98	XP_002525055.1	CDP-diacylglycerol--glycerol-3-phosphate 3-phosphatidyltransferase 2 [Ricinus communis] EEF37302.1 cdp-diacylglycerol--glycerol-3-phosphate 3-phosphatidyltransferase, putative [Ricinus communis]	29758.m000647
RcuChr06m2747	RcuChr06g2747	10536	1432	1617	151	216	508	77.8	6e-31	38/66	58	XP_020087855.1	acyl-CoA-binding domain-containing protein 5 isoform X1 [Ananas comosus] XP_020087863.1 acyl-CoA-binding domain-containing protein 5 isoform X1 [Ananas comosus] XP_020087869.1 acyl-CoA-binding domain-containing protein 5 isoform X1 [Ananas comosus]	29939.m000539	29939.m000539
RcuChr07m0014	RcuChr07g0014	1098	1	1095	1	366	499	636	0	362/366	99	YP_005090187.1	acetyl-CoA carboxylase beta subunit (chloroplast) [Ricinus communis] AEJ82564.1 acetyl-CoA carboxylase beta subunit (chloroplast) [Ricinus communis]
RcuChr07m0015	RcuChr07g0015	1079	462	1076	270	475	475	391	0	191/206	93	AAY16733.1	ribulose-1,5-bisphosphate carboxylase/oxygenase large subunit (chloroplast) [Adriana tomentosa var. tomentosa]	30061.m000288
RcuChr07m0016	RcuChr07g0016	315	1	312	1	104	114	177	2e-55	103/104	99	ABD27805.1	ribulose-1,5-bisphosphate carboxylase/oxygenase large subunit, partial (chloroplast) [Lithotoma axillaris]
RcuChr07m0032	RcuChr07g0032	1451	1023	1448	326	467	467	293	0	141/142	99	CAC06103.1	ribulose bisphosphate carboxylase oxygenase, partial (chloroplast) [Maesopsis eminii]	29923.m000793
RcuChr07m0033	RcuChr07g0033	186	1	174	39	96	274	122	6e-33	58/58	100	EEF27141.1	carboxyl-tansferase, subunit of Het-ACCase, partial [Ricinus communis]
RcuChr07m0118	RcuChr07g0118	1032	1	1029	1	343	343	668	0	343/343	100	XP_002518025.1	probable carboxylesterase 18 [Ricinus communis] EEF44543.1 Gibberellin receptor GID1, putative [Ricinus communis]	29983.m003304
RcuChr07m0310	RcuChr07g0310	6598	726	1196	1	157	681	333	1e-94	157/157	100	XP_002525155.2	acyl-coenzyme A oxidase 3, peroxisomal [Ricinus communis]	29646.m001117
RcuChr07m0373	RcuChr07g0373	2597	233	1117	1	295	295	581	0	295/295	100	XP_002533270.1	elongation of fatty acids protein 3-like [Ricinus communis] EEF29102.1 conserved hypothetical protein [Ricinus communis]	29250.m000231	30170.m013989
RcuChr07m0462	RcuChr07g0462	3239	694	1002	45	147	264	184	2e-48	90/103	87	XP_002522313.1	very-long-chain 3-oxoacyl-CoA reductase [Ricinus communis] EEF39997.1 short-chain dehydrogenase, putative [Ricinus communis]	29676.m001620	30375.m000020
RcuChr07m0507	RcuChr07g0507	12623	1	1485	1	382	478	719	0	381/495	77	NP_001310636.1	uncharacterized LOC8262907 [Ricinus communis] EEF38788.1 triacylglycerol lipase, putative [Ricinus communis] AFQ93684.1 triacylglycerol acidic lipase TAL2 [Ricinus communis]	30115.m001214	30115.m001214	30115.m001215
RcuChr07m0508	RcuChr07g0508	5224	2823	3470	34	249	327	436	1e-136	210/216	97	EEF38789.1	triacylglycerol lipase, putative [Ricinus communis]	30115.m001216	30115.m001217
RcuChr07m0817	RcuChr07g0817	3508	441	722	1	62	221	113	3e-24	61/94	65	XP_015583548.1	very-long-chain (3R)-3-hydroxyacyl-CoA dehydratase PASTICCINO 2 [Ricinus communis]	29913.m000154
RcuChr07m0825	RcuChr07g0825	398	198	395	123	188	346	132	6e-59	65/66	98	XP_015581789.2	LOW QUALITY PROTEIN: acyl-CoA--sterol O-acyltransferase 1 [Ricinus communis]
RcuChr07m0826	RcuChr07g0826	456	1	453	196	346	346	310	7e-104	150/151	99	XP_015581789.2	LOW QUALITY PROTEIN: acyl-CoA--sterol O-acyltransferase 1 [Ricinus communis]	27749.m000336
RcuChr07m0827	RcuChr07g0827	3974	3375	2704	123	346	346	451	3e-169	221/224	99	XP_015581789.2	LOW QUALITY PROTEIN: acyl-CoA--sterol O-acyltransferase 1 [Ricinus communis]	27749.m000337
RcuChr07m0913	RcuChr07g0913	4568	3458	3925	213	369	369	286	1e-82	141/157	90	XP_002531269.1	ubiquitin carboxyl-terminal hydrolase 4 [Ricinus communis] EEF31133.1 Ubiquitin carboxyl-terminal hydrolase, putative [Ricinus communis]	28281.m000381
RcuChr07m0942	RcuChr07g0942	5228	2542	3450	186	488	687	587	0	281/303	93	XP_021678429.1	acyl-coenzyme A oxidase 2, peroxisomal [Hevea brasiliensis]	29713.m000177	29713.m000178
RcuChr07m1062	RcuChr07g1062	2222	541	948	23	158	364	285	1e-85	136/136	100	XP_002529241.1	salicylate carboxymethyltransferase [Ricinus communis] EEF33154.1 Benzoate carboxyl methyltransferase, putative [Ricinus communis]	29409.m000272	29409.m000274	29409.m000281	29409.m000282	29409.m000283	29409.m000284	29409.m000284
RcuChr07m1109	RcuChr07g1109	4192	1876	2193	71	176	350	208	8e-56	104/106	98	XP_002532773.1	protein S-acyltransferase 8 [Ricinus communis] EEF29612.1 zinc finger protein, putative [Ricinus communis]	27965.m000111
RcuChr07m1112	RcuChr07g1112	6761	3591	4082	360	477	563	216	9e-56	116/164	71	XP_015583093.1	ubiquitin carboxyl-terminal hydrolase 27 isoform X1 [Ricinus communis]	27965.m000113
RcuChr07m1195	RcuChr07g1195	1858	38	1699	1	562	562	1120	0	554/562	99	XP_025013678.1	probable acyl-activating enzyme 6 [Ricinus communis] EEF40185.1 AMP dependent ligase, putative [Ricinus communis]	30206.m000779
RcuChr07m2108	RcuChr07g2108	6364	5470	6111	285	498	498	444	1e-135	214/214	100	XP_015580968.1	fatty acid hydroperoxide lyase, chloroplastic [Ricinus communis]	29901.m000415
RcuChr07m2154	RcuChr07g2154	6551	5345	5833	533	664	664	247	2e-65	124/163	76	XP_015578578.1	peroxisomal acyl-coenzyme A oxidase 1 [Ricinus communis] EEF37074.1 acyl-CoA oxidase, putative [Ricinus communis]	29948.m000719
RcuChr07m2155	RcuChr07g2155	2024	984	1685	46	243	243	347	2e-112	198/234	85	XP_002534398.2	1-aminocyclopropane-1-carboxylate oxidase [Ricinus communis]	27856.m000040
RcuChr07m2162	RcuChr07g2162	6627	4603	4950	157	245	485	159	2e-73	85/116	73	EEF33441.1	Triacylglycerol lipase 2 precursor, putative [Ricinus communis]	29620.m000558
RcuChr07m2163	RcuChr07g2163	2608	1089	1355	179	240	404	112	9e-99	61/89	69	XP_015580726.1	triacylglycerol lipase 2 isoform X1 [Ricinus communis]	29620.m000557
RcuChr07m2164	RcuChr07g2164	2156	1728	2045	307	412	412	149	2e-140	83/106	78	XP_021641628.1	triacylglycerol lipase 2-like [Hevea brasiliensis]	29620.m000556
RcuChr07m2175	RcuChr07g2175	4828	243	548	39	135	472	172	2e-58	82/102	80	XP_002528950.1	3-oxoacyl-[acyl-carrier-protein] synthase, mitochondrial isoform X2 [Ricinus communis] EEF33424.1 3-oxoacyl-[acyl-carrier-protein] synthase, putative [Ricinus communis]	27478.m000089	29620.m000541	55548.m000014
RcuChr07m2300	RcuChr07g2300	5036	622	873	48	131	389	142	2e-61	83/84	99	XP_002532209.1	indole-3-glycerol phosphate synthase, chloroplastic [Ricinus communis] EEF30178.1 tryptophan biosynthesis protein, trpc, putative [Ricinus communis]	29732.m000319
RcuChr07m2301	RcuChr07g2301	5135	78	473	1	132	508	233	2e-62	132/132	100	XP_002532210.1	ribulose-1,5 bisphosphate carboxylase/oxygenase large subunit N-methyltransferase, chloroplastic [Ricinus communis] EEF30179.1 Ribulose-1,5 bisphosphate carboxylase/oxygenase large subunit N-methyltransferase, chloroplast precursor, putative [Ricinus communis]	29732.m000320
RcuChr07m2351	RcuChr07g2351	9146	2693	2908	260	331	648	155	3e-67	71/72	99	XP_015579287.1	phospholipid--sterol O-acyltransferase isoform X1 [Ricinus communis]	29637.m000766
#RcuChr07m2501	RcuChr07g2501	4955	4405	4683	279	371	371	190	9e-68	92/93	99	NP_001310680.1	oleoyl-acyl carrier protein thioesterase 1, chloroplastic [Ricinus communis] ABS30422.1 acyl-ACP thioesterase FatA [Ricinus communis] EEF29646.1 Oleoyl-acyl carrier protein thioesterase, putative [Ricinus communis]	30217.m000262
RcuChr07m2700	RcuChr07g2700	5524	1175	2179	60	302	499	447	1e-137	240/335	72	EEF30021.1	triacylglycerol lipase, putative [Ricinus communis]	29584.m000250
RcuChr07m2863	RcuChr07g2863	2301	1	639	1	213	320	349	9e-111	213/213	100	XP_002515031.1	very-long-chain 3-oxoacyl-CoA reductase 1 [Ricinus communis] EEF47585.1 steroid dehydrogenase, putative [Ricinus communis]	29929.m004767
RcuChr07m2864	RcuChr07g2864	1430	1	642	1	214	324	427	2e-145	211/214	99	XP_002515030.1	very-long-chain 3-oxoacyl-CoA reductase 1 [Ricinus communis] EEF47584.1 steroid dehydrogenase, putative [Ricinus communis]	29929.m004766
RcuChr07m2865	RcuChr07g2865	1799	249	980	1	244	366	491	7e-168	244/244	100	XP_002515029.2	very-long-chain 3-oxoacyl-CoA reductase 1 [Ricinus communis]	29929.m004765
RcuChr07m2867	RcuChr07g2867	1331	1	660	1	220	331	418	7e-142	215/220	98	XP_002515027.1	very-long-chain 3-oxoacyl-CoA reductase 1 [Ricinus communis] EEF47581.1 steroid dehydrogenase, putative [Ricinus communis]	29929.m004763
RcuChr07m2868	RcuChr07g2868	3755	3	656	4	221	338	445	8e-143	218/218	100	XP_002515026.2	very-long-chain 3-oxoacyl-CoA reductase-like protein At1g24470 [Ricinus communis]	29929.m004762
RcuChr07m2888	RcuChr07g2888	1858	1	639	1	213	391	397	2e-130	213/213	100	XP_002515006.1	probable carboxylesterase 16 [Ricinus communis] EEF47560.1 catalytic, putative [Ricinus communis]	29929.m004742	29929.m004745
#RcuChr07m2898	RcuChr07g2898	4040	2161	2565	254	360	394	97.1	2e-31	64/135	47	OEL12584.1	3-oxoacyl-[acyl-carrier-protein] reductase, chloroplastic [Dichanthelium oligosanthes]	29929.m004732	35489.m000024
RcuChr07m3056	RcuChr07g3056	3073	215	427	1	71	128	143	5e-36	71/71	100	XP_002514816.1	acyl carrier protein 2, mitochondrial [Ricinus communis] EEF47370.1 acyl carrier protein, putative [Ricinus communis]	29929.m004551
#RcuChr07m3083	RcuChr07g3083	1204	168	857	28	224	378	400	7e-177	195/230	85	ACN23827.1	stearoyl-acyl-carrier protein desaturase [Ricinus communis]	29929.m004515
#RcuChr07m3084	RcuChr07g3084	3543	2983	3540	210	395	395	391	7e-122	186/186	100	NP_001310638.1	stearoyl-[acyl-carrier-protein] 9-desaturase, chloroplastic-like [Ricinus communis] ACG59946.1 stearoyl-acyl-carrier protein desaturase [Ricinus communis] ACG59949.1 stearoyl-acyl-carrier protein desaturase [Ricinus communis]	29929.m004514
#RcuChr08m0155	RcuChr08g0155	5685	3157	3426	211	274	391	123	3e-38	63/90	70	XP_021903758.1	glycerol-3-phosphate acyltransferase 3 isoform X1 [Carica papaya] XP_021903759.1 glycerol-3-phosphate acyltransferase 3 isoform X1 [Carica papaya]	30122.m000357
RcuChr08m0500	RcuChr08g0500	1014	1	1011	1	337	337	667	0	335/337	99	XP_002525545.1	probable carboxylesterase 15 [Ricinus communis] EEF36804.1 catalytic, putative [Ricinus communis]	29686.m000861
RcuChr08m0542	RcuChr08g0542	3129	1694	2374	203	429	520	438	4e-161	225/227	99	EEF29057.1	triacylglycerol lipase, putative [Ricinus communis]
RcuChr08m0543	RcuChr08g0543	2817	1755	2426	204	427	519	476	0	224/224	100	NP_001310639.1	uncharacterized LOC8263958 [Ricinus communis] AAV66577.1 lipase [Ricinus communis] AFQ93681.1 triacylglycerol acidic lipase OBL2 [Ricinus communis]	29884.m000182	32873.m000014
RcuChr08m0544	RcuChr08g0544	3953	2346	3095	225	474	555	523	0	250/250	100	NP_001310664.1	uncharacterized LOC8273037 [Ricinus communis] AFQ93686.1 triacylglycerol acidic lipase TAL4 [Ricinus communis]	29884.m000183
RcuChr08m0589	RcuChr08g0589	2109	1166	1450	1	95	172	193	2e-75	95/95	100	EEF28460.1	carboxylic ester hydrolase, putative [Ricinus communis]	28885.m000107
#RcuChr08m0673	RcuChr08g0673	6311	5104	5595	355	518	518	337	6e-98	161/164	98	XP_025013503.1	phospholipid:diacylglycerol acyltransferase 1 isoform X2 [Ricinus communis]	29706.m001305
RcuChr08m0760	RcuChr08g0760	5336	1696	1830	132	176	482	96.7	1e-30	44/45	98	XP_002534122.1	ubiquitin carboxyl-terminal hydrolase 7 [Ricinus communis] EEF28259.1 Ubiquitin carboxyl-terminal hydrolase, putative [Ricinus communis]	27395.m000080
#RcuChr08m0980	RcuChr08g0980	2094	1	1275	1	288	363	513	5e-175	288/425	68	XP_002517525.1	palmitoyl-acyl carrier protein thioesterase, chloroplastic [Ricinus communis] EEF44689.1 Myristoyl-acyl carrier protein thioesterase, chloroplast precursor, putative [Ricinus communis]	29841.m002744
RcuChr08m1026	RcuChr08g1026	5678	4765	5031	200	258	258	111	5e-23	59/89	66	XP_002517576.1	acyl-protein thioesterase 2 [Ricinus communis] EEF44740.1 Acyl-protein thioesterase, putative [Ricinus communis]	29841.m002798
RcuChr08m1083	RcuChr08g1083	2218	1	573	1	191	386	389	1e-125	191/191	100	XP_002517641.1	palmitoyl-monogalactosyldiacylglycerol delta-7 desaturase, chloroplastic [Ricinus communis] EEF44805.1 delta 9 desaturase, putative [Ricinus communis]	29841.m002863
#RcuChr08m1085	RcuChr08g1085	1670	1	411	1	137	285	226	4e-66	137/137	100	XP_002517643.1	phosphatidylcholine:diacylglycerol cholinephosphotransferase 1 [Ricinus communis] EEF44807.1 conserved hypothetical protein [Ricinus communis]	29841.m002865
RcuChr08m1123	RcuChr08g1123	2937	1225	2187	120	440	521	631	0	321/321	100	XP_002517681.1	glycerol kinase [Ricinus communis] XP_025012832.1 glycerol kinase [Ricinus communis] EEF44845.1 glycerol kinase, putative [Ricinus communis]	29841.m002903
RcuChr08m1136	RcuChr08g1136	2530	1760	1816	45	63	169	44.7	6e-07	19/19	100	XP_015573783.1	phosphopantothenoylcysteine decarboxylase subunit VHS3-like [Ricinus communis]
RcuChr08m1259	RcuChr08g1259	7315	1	372	1	128	429	206	1e-53	113/128	88	XP_015570972.1	ribulose bisphosphate carboxylase/oxygenase activase, chloroplastic [Ricinus communis] XP_025012037.1 ribulose bisphosphate carboxylase/oxygenase activase, chloroplastic [Ricinus communis] XP_025012038.1 ribulose bisphosphate carboxylase/oxygenase activase, chloroplastic [Ricinus communis]	30131.m006918
RcuChr08m1344	RcuChr08g1344	9176	6374	6745	430	553	718	253	6e-67	124/124	100	XP_002512877.1	acyltransferase-like protein At3g26840, chloroplastic [Ricinus communis] EEF49380.1 catalytic, putative [Ricinus communis]	30131.m007010
RcuChr08m1609	RcuChr08g1609	4606	756	965	61	130	493	121	3e-37	56/70	80	XP_021665744.1	fatty acyl-CoA reductase 3-like [Hevea brasiliensis]	30055.m001532	30055.m001532
RcuChr08m1610	RcuChr08g1610	2825	841	1218	129	227	493	188	2e-102	99/126	79	XP_002523777.1	fatty acyl-CoA reductase 3 [Ricinus communis] EEF38503.1 Male sterility protein, putative [Ricinus communis]	30055.m001531
RcuChr08m1611	RcuChr08g1611	6022	1585	2349	227	398	493	331	4e-96	172/255	67	XP_002523777.1	fatty acyl-CoA reductase 3 [Ricinus communis] EEF38503.1 Male sterility protein, putative [Ricinus communis]	29791.m000526
RcuChr08m1909	RcuChr08g1909	3742	1	195	1	65	379	136	3e-44	65/65	100	XP_002530235.1	enoyl-[acyl-carrier-protein] reductase, mitochondrial [Ricinus communis] EEF32141.1 zinc binding dehydrogenase, putative [Ricinus communis]	28752.m000327
RcuChr08m1962	RcuChr08g1962	3171	1	231	1	50	217	82	8e-29	50/77	65	XP_002531119.1	very-long-chain (3R)-3-hydroxyacyl-CoA dehydratase 2 [Ricinus communis] EEF31284.1 ptpla domain protein, putative [Ricinus communis]	29788.m000339
#RcuChr08m2014	RcuChr08g2014	6740	4690	5286	165	363	363	366	4e-110	190/199	95	1OQ4_A	Chain A, The Crystal Structure of the Complex between Stearoyl Acyl Carrier Protein Desaturase from Ricinus Communis (Castor Bean) and Azide. 1OQ4_B Chain B, The Crystal Structure of the Complex between Stearoyl Acyl Carrier Protein Desaturase from Ricinus Communis (Castor Bean) and Azide. 1OQ4_C Chain C, The Crystal Structure of the Complex between Stearoyl Acyl Carrier Protein Desaturase from R…	28470.m000428	30020.m000203
RcuChr08m2396	RcuChr08g2396	5425	4094	5254	135	468	468	668	0	332/387	86	XP_015579905.1	probable carboxylesterase 15 isoform X2 [Ricinus communis]	29755.m000438	29755.m000440
RcuChr08m2506	RcuChr08g2506	10873	7376	7933	575	760	889	392	4e-112	186/186	100	XP_002515876.1	ubiquitin carboxyl-terminal hydrolase 8 [Ricinus communis] EEF46545.1 Ubiquitin carboxyl-terminal hydrolase, putative [Ricinus communis]	29854.m001132
RcuChr09m0028	RcuChr09g0028	5368	458	1471	6	294	546	560	7e-179	285/338	84	XP_015570826.1	ubiquitin carboxyl-terminal hydrolase 24 isoform X1 [Ricinus communis]	30131.m007250
RcuChr09m0035	RcuChr09g0035	2154	1	675	1	225	467	461	4e-168	222/225	99	EEF49622.1	glycerol-3-phosphate dehydrogenase, putative [Ricinus communis]	30131.m007256
RcuChr09m0082	RcuChr09g0082	2269	822	1043	46	119	165	119	5e-54	57/74	77	XP_016693851.1	PREDICTED: 1,4-dihydroxy-2-naphthoyl-CoA thioesterase 1-like [Gossypium hirsutum]	29889.m003415
#RcuChr09m0085	RcuChr09g0085	1177	635	1174	153	332	332	315	2e-102	180/180	100	XP_002519339.1	diacylglycerol O-acyltransferase 3, cytosolic [Ricinus communis] EEF43203.1 soluble diacylglycerol acyltransferase [Ricinus communis]	29889.m003411
RcuChr09m0184	RcuChr09g0184	2594	295	705	1	137	265	279	7e-84	137/137	100	XP_002519236.1	probable enoyl-CoA hydratase 1, peroxisomal [Ricinus communis] EEF43100.1 3-hydroxybutyryl-CoA dehydratase, putative [Ricinus communis]	29889.m003307	30966.m000029	31967.m000029	39515.m000013
RcuChr09m0271	RcuChr09g0271	3484	2726	3481	389	640	640	480	2e-152	252/252	100	XP_002516978.1	uncharacterized protein LOC8278782 [Ricinus communis] EEF45592.1 triacylglycerol lipase, putative [Ricinus communis]	29726.m004101
RcuChr09m0300	RcuChr09g0300	6415	4588	5256	538	669	726	209	0	119/223	53	XP_006380154.1	glyoxysomal fatty acid beta-oxidation multifunctional protein MFP-a [Populus trichocarpa] PNT26088.1 hypothetical protein POPTR_008G220400v3 [Populus trichocarpa]	27674.m000026	29726.m004067	29726.m004067	29726.m004068	35567.m000014	48625.m000019
RcuChr09m0353	RcuChr09g0353	5341	3541	4533	280	568	612	519	1e-162	286/331	86	XP_025012729.1	acyl-CoA-binding domain-containing protein 6 isoform X2 [Ricinus communis]	29726.m004005
#RcuChr09m0377	RcuChr09g0377	2831	1502	1627	60	101	141	87.8	2e-16	42/42	100	XP_002516860.1	acyl carrier protein 1, chloroplastic [Ricinus communis] EEF45474.1 acyl carrier protein, putative [Ricinus communis]	29726.m003980
#RcuChr09m0468	RcuChr09g0468	7717	5933	6229	473	543	694	142	3e-72	71/99	72	NP_001310618.1	long chain acyl-CoA synthetase 6, peroxisomal [Ricinus communis] ABC02881.1 ACS2 [Ricinus communis] EEF45375.1 Acyl-CoA synthetase [Ricinus communis]	29844.m003365
RcuChr09m0667	RcuChr09g0667	1682	345	1121	1	259	259	464	2e-159	257/259	99	XP_002529310.1	enoyl-CoA delta isomerase 2, peroxisomal [Ricinus communis] EEF33079.1 catalytic, putative [Ricinus communis]	29603.m000528
RcuChr09m0697	RcuChr09g0697	1613	150	1007	1	286	295	583	0	282/286	99	XP_002531530.2	phosphoenolpyruvate carboxylase kinase 1 [Ricinus communis]	29895.m000312
RcuChr09m0776	RcuChr09g0776	2025	393	1394	1	334	334	669	0	333/334	99	XP_002528343.1	probable carboxylesterase 18 [Ricinus communis] EEF34015.1 Arylacetamide deacetylase, putative [Ricinus communis]	30008.m000796
RcuChr09m0795	RcuChr09g0795	5845	5300	5422	480	520	520	93.2	9e-44	41/41	100	XP_002518200.2	carboxyl-terminal-processing peptidase 2, chloroplastic [Ricinus communis]	29904.m003051
RcuChr09m0897	RcuChr09g0897	6039	1767	4550	1	928	1006	1683	0	925/928	99	XP_015574073.1	ubiquitin carboxyl-terminal hydrolase 2 isoform X1 [Ricinus communis] EEF44219.1 conserved hypothetical protein [Ricinus communis]	29904.m002934
RcuChr09m1002	RcuChr09g1002	1303	94	1086	1	331	331	669	0	331/331	100	XP_002522741.1	probable long-chain-alcohol O-fatty-acyltransferase 5 [Ricinus communis] EEF39592.1 acyltransferase, putative [Ricinus communis]	29629.m001370
RcuChr09m1052	RcuChr09g1052	1486	272	1330	7	359	359	632	0	353/353	100	XP_002529023.1	probable long-chain-alcohol O-fatty-acyltransferase 1 [Ricinus communis] EEF33334.1 acyltransferase, putative [Ricinus communis]	27613.m000613
RcuChr09m1053	RcuChr09g1053	1116	1	1113	1	322	322	576	0	322/371	87	XP_015580770.1	probable long-chain-alcohol O-fatty-acyltransferase 5 isoform X1 [Ricinus communis]	27613.m000612	27613.m000612
RcuChr09m1054	RcuChr09g1054	348	2	346	204	317	348	171	4e-50	84/115	73	XP_002311581.1	probable long-chain-alcohol O-fatty-acyltransferase 5 [Populus trichocarpa] PNT24655.1 hypothetical protein POPTR_008G145700v3 [Populus trichocarpa]
RcuChr09m1055	RcuChr09g1055	564	1	561	157	343	343	390	8e-135	187/187	100	XP_002529021.1	probable long-chain-alcohol O-fatty-acyltransferase 2 [Ricinus communis] EEF33332.1 acyltransferase, putative [Ricinus communis]	27613.m000611
RcuChr09m1155	RcuChr09g1155	4034	1005	1328	1	108	306	223	3e-61	107/108	99	XP_015577135.1	1-acyl-sn-glycerol-3-phosphate acyltransferase isoform X1 [Ricinus communis] XP_015577136.1 1-acyl-sn-glycerol-3-phosphate acyltransferase isoform X1 [Ricinus communis] XP_015577137.1 1-acyl-sn-glycerol-3-phosphate acyltransferase isoform X1 [Ricinus communis]	29666.m001430
RcuChr09m1176	RcuChr09g1176	894	1	891	1	297	297	562	0	297/297	100	XP_002522972.1	fatty acid desaturase 4, chloroplastic [Ricinus communis] EEF39402.1 ubiquitin-conjugating enzyme variant, putative [Ricinus communis]	29666.m001456
RcuChr09m1339	RcuChr09g1339	12688	1664	2002	127	239	804	239	5e-79	112/113	99	XP_015578853.1	ubiquitin carboxyl-terminal hydrolase 14 [Ricinus communis]	30027.m000845
RcuChr09m1904	RcuChr09g1904	6671	3920	5395	405	868	965	893	0	463/492	94	XP_002530381.1	phosphoenolpyruvate carboxylase, housekeeping isozyme isoform X1 [Ricinus communis] EEF32001.1 Phosphoenolpyruvate carboxylase, putative [Ricinus communis]	29634.m002165	29645.m000074	29983.m003317
RcuChr09m1961	RcuChr09g1961	3307	1233	1601	89	211	300	248	1e-70	121/123	98	XP_002532069.1	mitochondrial dicarboxylate/tricarboxylate transporter DTC [Ricinus communis] EEF30324.1 mitochondrial oxoglutarate/malate carrier protein, putative [Ricinus communis]	30084.m000187
#RcuChr09m1978	RcuChr09g1978	2550	1	690	15	244	320	424	7e-139	222/230	97	XP_025015592.1	jmjC domain-containing protein 7 isoform X3 [Ricinus communis]	29489.m000170
#RcuChr09m2070	RcuChr09g2070	1164	1	1161	1	387	387	778	0	387/387	100	XP_002528127.1	oleate hydroxylase FAH12 isoform X1 [Ricinus communis] Q41131.2 RecName: Full=Oleate hydroxylase FAH12; Short=RcFAH12; AltName: Full=Oleate Delta(12)-hydroxylase; AltName: Full=Phosphatidylcholine 12-monooxygenase EEF34257.1 oleate 12-hydroxylase [Ricinus communis] CDG23427.1 oleate 12-hydroxylase [synthetic construct]	28035.m000362
#RcuChr09m2083	RcuChr09g2083	5721	351	632	1	94	393	179	4e-45	93/94	99	EEF32433.1	short-chain dehydrogenase, putative [Ricinus communis]	29650.m000277
RcuChr09m2095	RcuChr09g2095	10398	7458	8228	311	567	644	523	2e-160	251/257	98	XP_002529521.1	ubiquitin carboxyl-terminal hydrolase 25 isoform X2 [Ricinus communis] EEF32859.1 cysteine-type endopeptidase, putative [Ricinus communis]	30202.m000255
RcuChr09m2122	RcuChr09g2122	2161	340	1107	1	256	262	499	5e-171	255/256	99	XP_002528495.2	enoyl-CoA delta isomerase 1, peroxisomal [Ricinus communis]	29585.m000585	29585.m000586	29989.m000433
RcuChr09m2308	RcuChr09g2308	6301	3312	3680	174	296	296	261	1e-74	123/123	100	XP_002528242.1	uncharacterized protein LOC8277278 [Ricinus communis] EEF34127.1 3-hydroxyacyl-CoA dehyrogenase, putative [Ricinus communis]	29668.m000313
RcuChr10m0142	RcuChr10g0142	4962	1	663	39	260	274	439	1e-138	218/222	98	EEF27141.1	carboxyl-tansferase, subunit of Het-ACCase, partial [Ricinus communis]
RcuChr10m0199	RcuChr10g0199	586	1	195	1	65	126	132	2e-36	65/65	100	XP_025013804.1	acyl carrier protein 3, mitochondrial [Ricinus communis] EEF39478.1 acyl carrier protein, putative [Ricinus communis]	29826.m000732
RcuChr10m0203	RcuChr10g0203	8299	511	1035	1	105	412	147	5e-47	101/175	58	XP_015577103.1	acetyl-CoA acetyltransferase, cytosolic 1 isoform X1 [Ricinus communis]	29826.m000730
RcuChr10m0400	RcuChr10g0400	3801	1320	1796	184	342	474	331	1e-175	157/159	99	XP_002532996.1	ribulose bisphosphate carboxylase/oxygenase activase 2, chloroplastic [Ricinus communis] EEF29388.1 Ribulose bisphosphate carboxylase/oxygenase activase 1, chloroplast precursor, putative [Ricinus communis]	28345.m000114
#RcuChr10m0493	RcuChr10g0493	6659	4273	5418	382	763	766	693	0	380/382	99	XP_002527864.1	acetyl-coenzyme A carboxylase carboxyl transferase subunit alpha, chloroplastic [Ricinus communis] EEF34495.1 carboxyl-tansferase, subunit of Het-ACCase [Ricinus communis]	27798.m000585
#RcuChr10m0522	RcuChr10g0522	3989	2653	3546	196	490	494	583	0	287/298	96	XP_002531350.2	LOW QUALITY PROTEIN: glycerol-3-phosphate 2-O-acyltransferase 6 [Ricinus communis]	29969.m000267
RcuChr10m0568	RcuChr10g0568	3280	470	985	1	172	452	306	1e-162	172/172	100	XP_002532116.1	omega-3 fatty acid desaturase, chloroplastic [Ricinus communis] EEF30278.1 Omega-3 fatty acid desaturase, chloroplast precursor, putative [Ricinus communis]	28176.m000273
RcuChr10m0571	RcuChr10g0571	5672	1239	2144	79	232	440	243	3e-66	150/302	50	XP_002532113.1	acyl-coenzyme A oxidase 4, peroxisomal [Ricinus communis] EEF30275.1 acyl-CoA dehydrogenase, putative [Ricinus communis]	28176.m000270	47455.m000025
RcuChr10m0583	RcuChr10g0583	3837	2914	3450	44	222	222	369	1e-115	178/179	99	EEF31892.1	tricarboxylate transport protein, putative [Ricinus communis]	29601.m000450	29601.m000450	29601.m000450
RcuChr10m0591	RcuChr10g0591	2506	1005	1883	232	493	607	498	1e-163	259/293	88	XP_002530500.1	pyruvate decarboxylase 2 [Ricinus communis] EEF31884.1 pyruvate decarboxylase, putative [Ricinus communis]	29601.m000442
RcuChr10m0710	RcuChr10g0710	3905	441	1472	1	260	310	323	6e-97	227/344	66	XP_015580573.1	protein FATTY ACID EXPORT 3, chloroplastic isoform X2 [Ricinus communis]	29915.m000475
RcuChr10m0911	RcuChr10g0911	8860	1526	2326	373	629	1172	336	2e-168	185/267	69	XP_012070289.1	putative acyl-activating enzyme 19 isoform X1 [Jatropha curcas]	30148.m001448	30148.m001448	30665.m000016	31374.m000016
RcuChr10m1102	RcuChr10g1102	1181	1	264	1	88	249	175	7e-49	86/88	98	EEF40428.1	carboxylic ester hydrolase, putative [Ricinus communis]	29680.m001742
RcuChr10m1151	RcuChr10g1151	2218	230	1006	1	259	276	538	0	257/259	99	XP_002521969.2	LOW QUALITY PROTEIN: phosphoenolpyruvate carboxylase kinase 2 [Ricinus communis]	29680.m001684	29680.m001685
RcuChr10m1172	RcuChr10g1172	5808	1565	2230	245	395	629	283	3e-95	148/222	67	XP_002521948.1	phosphoribosylaminoimidazole carboxylase, chloroplastic [Ricinus communis] EEF40352.1 phosphoribosylaminoimidazole carboxylase atpase-subunit, putative [Ricinus communis]	29680.m001662	29680.m001663
RcuChr10m1264	RcuChr10g1264	3494	1	459	1	153	723	311	3e-88	152/153	99	XP_002512271.1	acyltransferase-like protein At1g54570, chloroplastic isoform X1 [Ricinus communis] EEF49723.1 catalytic, putative [Ricinus communis]
RcuChr10m1265	RcuChr10g1265	4016	601	1122	399	575	687	243	2e-64	133/181	73	XP_015570398.1	acyltransferase-like protein At1g54570, chloroplastic isoform X2 [Ricinus communis]
RcuChr10m1290	RcuChr10g1290	8607	1	459	1	153	723	312	6e-87	153/153	100	XP_002512271.1	acyltransferase-like protein At1g54570, chloroplastic isoform X1 [Ricinus communis] EEF49723.1 catalytic, putative [Ricinus communis]	30128.m008656
#RcuChr10m1304	RcuChr10g1304	1425	858	1001	54	101	135	87.4	8e-17	44/48	92	XP_002512285.1	acyl carrier protein 1, chloroplastic [Ricinus communis] EEF49737.1 acyl carrier protein [Ricinus communis]	30128.m008670
#RcuChr10m1397	RcuChr10g1397	8263	4282	4416	390	434	690	96.3	4e-35	45/45	100	NP_001310697.1	long chain acyl-CoA synthetase 7, peroxisomal [Ricinus communis] ABC02882.1 ACS4 [Ricinus communis]	30128.m008777
RcuChr10m1425	RcuChr10g1425	7339	1213	1788	79	188	675	159	2e-47	92/192	48	XP_006472069.1	acyl-CoA-binding domain-containing protein 4 [Citrus sinensis] XP_006433393.2 acyl-CoA-binding domain-containing protein 4 [Citrus clementina]	30128.m008808
RcuChr10m1455	RcuChr10g1455	1470	1	738	1	165	264	276	2e-86	163/246	66	EEF49897.1	carboxylic ester hydrolase, putative [Ricinus communis]	30128.m008844
RcuChr10m2149	RcuChr10g2149	7459	5400	6191	146	380	506	438	3e-133	234/264	89	EEF38293.1	Ubiquitin carboxyl-terminal hydrolase, putative [Ricinus communis]	29333.m001069	29333.m001070
RcuChr10m2172	RcuChr10g2172	2963	1	669	1	223	325	460	3e-151	222/223	99	XP_002524110.1	probable carboxylesterase 15 [Ricinus communis] EEF38320.1 Gibberellin receptor GID1, putative [Ricinus communis]	29333.m001098
RcuChr10m2179	RcuChr10g2179	12184	1748	2026	131	223	1120	194	5e-122	90/93	97	EEF38330.1	Ubiquitin carboxyl-terminal hydrolase, putative [Ricinus communis]	29333.m001108	29333.m001109
RcuChr10m2200	RcuChr10g2200	5577	4508	4942	259	405	456	276	8e-78	136/147	93	XP_025015762.1	fatty acyl-CoA reductase 2, partial [Ricinus communis]	28902.m000037
RcuChr10m2202	RcuChr10g2202	5264	4486	4869	1	128	285	265	3e-76	126/128	98	XP_002534681.1	fatty acyl-CoA reductase 2, partial [Ricinus communis] EEF27702.1 conserved hypothetical protein [Ricinus communis]	30029.m000017	30029.m000017	41482.m000013
#RcuChr10m2241	RcuChr10g2241	5486	1267	1506	14	93	359	169	7e-42	80/80	100	EEF28925.1	Enoyl-ACP reductase precursor (EAR) [Ricinus communis]	27843.m000160
#RcuChr10m2249	RcuChr10g2249	1152	1	1149	1	383	383	769	0	383/383	100	NP_001310648.1	delta(12)-fatty-acid desaturase FAD2 [Ricinus communis] ABK59093.1 oleate desaturase [Ricinus communis] EEF31658.1 omega-6 desaturase, endoplasmic reticulum [Ricinus communis]	29613.m000358
RcuChr10m2324	RcuChr10g2324	4414	3589	3741	120	170	287	102	1e-48	48/51	94	XP_021641612.1	carboxyl-terminal-processing peptidase 3, chloroplastic, partial [Hevea brasiliensis]	27810.m000652	27810.m000652
#RcuChr10m2330	RcuChr10g2330	6402	5691	5954	308	395	395	177	6e-68	87/88	99	NP_001310679.1	1-acyl-sn-glycerol-3-phosphate acyltransferase 2 [Ricinus communis] ACC59198.1 1-acyl-sn-glycerol-3-phosphate acyltransferase [Ricinus communis] EEF35644.1 lysophosphatidic acid acyltransferase, putative [Ricinus communis] AFR42413.1 A-class lysophosphatidate acyltransferase-2 [Ricinus communis] AHZ90531.1 lysophosphatidyl acyltransferase 2 [Ricinus communis]	27810.m000646
RcuChr10m2413	RcuChr10g2413	4330	961	1638	1	226	466	457	7e-144	221/226	98	XP_002533846.1	glycerol-3-phosphate dehydrogenase [NAD(+)] GPDHC1, cytosolic [Ricinus communis] XP_015583640.1 glycerol-3-phosphate dehydrogenase [NAD(+)] GPDHC1, cytosolic [Ricinus communis] EEF28537.1 glycerol-3-phosphate dehydrogenase, putative [Ricinus communis]	29344.m000105
RcuChr10m2425	RcuChr10g2425	4166	283	489	40	108	222	145	2e-49	68/69	99	XP_002532672.1	protein FATTY ACID EXPORT 1, chloroplastic [Ricinus communis] EEF29719.1 transmembrane protein 14, putative [Ricinus communis]	28007.m000183
RcuChr10m2456	RcuChr10g2456	4808	746	2167	1	474	888	904	0	473/474	99	XP_025015044.1	triacylglycerol lipase SDP1 [Ricinus communis]	28470.m000422
RcuCtg18m0007	RcuCtg18g0007	186	1	174	39	96	274	122	6e-33	58/58	100	EEF27141.1	carboxyl-tansferase, subunit of Het-ACCase, partial [Ricinus communis]
RcuCtg19m0031	RcuCtg19g0031	372	1	315	39	145	274	128	6e-34	70/107	65	EEF27141.1	carboxyl-tansferase, subunit of Het-ACCase, partial [Ricinus communis]
RcuCtg20m0006	RcuCtg20g0006	1426	500	1423	168	475	475	641	0	307/308	99	AAY16733.1	ribulose-1,5-bisphosphate carboxylase/oxygenase large subunit (chloroplast) [Adriana tomentosa var. tomentosa]	30185.m000928
RcuCtg20m0007	RcuCtg20g0007	699	1	690	263	492	499	476	1e-165	229/230	99	YP_005090187.1	acetyl-CoA carboxylase beta subunit (chloroplast) [Ricinus communis] AEJ82564.1 acetyl-CoA carboxylase beta subunit (chloroplast) [Ricinus communis]
RcuCtg23m0014	RcuCtg23g0014	1422	357	1112	109	360	452	462	0	222/252	88	CAT99532.1	ribulose-1, 5-bisphosphate carboxylase/oxygenase large subunit, partial (chloroplast) [Fallopia dumetorum]
#RcuCtg23m0015	RcuCtg23g0015	714	1	711	263	499	499	492	3e-172	237/237	100	YP_005090187.1	acetyl-CoA carboxylase beta subunit (chloroplast) [Ricinus communis] AEJ82564.1 acetyl-CoA carboxylase beta subunit (chloroplast) [Ricinus communis]	28890.m000006
RcuCtg36m0004	RcuCtg36g0004	1449	1	1446	1	482	482	815	0	426/482	88	ASR93051.1	ribulose 1,5-bisphosphate carboxylase/oxygenase large subunit (chloroplast) [Trema levigata]	30184.m001172
RcuChr01m1454	RcuChr01g1454	2259	403	1983	1	527	527	1031	0	527/527	100	XP_002529975.1	3-ketoacyl-CoA synthase 1 [Ricinus communis] EEF32418.1 acyltransferase, putative [Ricinus communis]	27964.m000363
RcuChr02m0371	RcuChr02g0371	1509	1	1506	1	502	502	1045	0	502/502	100	XP_002510394.1	3-ketoacyl-CoA synthase 4 isoform X1 [Ricinus communis] EEF52581.1 acyltransferase, putative [Ricinus communis]	30170.m014048
RcuChr02m2734	RcuChr02g2734	1682	483	1679	132	503	503	699	0	372/399	93	XP_002530372.1	3-ketoacyl-CoA synthase 15 [Ricinus communis] EEF32005.1 acyltransferase, putative [Ricinus communis]	29777.m000271
RcuChr03m1404	RcuChr03g1404	3516	1213	2733	1	506	515	1028	0	497/507	98	XP_015580982.1	LOW QUALITY PROTEIN: 3-ketoacyl-CoA synthase 11-like [Ricinus communis]	29807.m000494
RcuChr03m1832	RcuChr03g1832	2055	764	1390	138	346	532	411	0	209/209	100	XP_002516167.1	3-ketoacyl-CoA synthase 10 [Ricinus communis] EEF46169.1 acyltransferase, putative [Ricinus communis]	29739.m003649
RcuChr04m2338	RcuChr04g2338	1446	1	1443	1	481	481	917	0	481/481	100	XP_002510886.3	3-ketoacyl-CoA synthase 6 [Ricinus communis] EEF51488.1 acyltransferase, putative [Ricinus communis]	30147.m014154
RcuChr05m2417	RcuChr05g2417	2448	587	2065	13	505	508	989	0	493/493	100	XP_002509491.1	3-ketoacyl-CoA synthase 4 [Ricinus communis] EEF50878.1 acyltransferase, putative [Ricinus communis]	30190.m010903
RcuChr06m1190	RcuChr06g1190	10211	9951	8587	1	455	455	913	0	454/455	99	XP_002529285.1	3-ketoacyl-CoA synthase 7 [Ricinus communis] EEF33117.1 acyltransferase, putative [Ricinus communis]	30071.m000449
RcuChr06m1191	RcuChr06g1191	1368	1	1365	1	455	455	913	0	454/455	99	XP_002529285.1	3-ketoacyl-CoA synthase 7 [Ricinus communis] EEF33117.1 acyltransferase, putative [Ricinus communis]	30071.m000448
RcuChr06m2366	RcuChr06g2366	1368	10	1365	5	451	451	682	0	335/453	74	XP_021622375.1	3-ketoacyl-CoA synthase 7-like [Manihot esculenta] OAY42326.1 hypothetical protein MANES_09G171200 [Manihot esculenta]	28077.m000078	28077.m000078
RcuChr06m2657	RcuChr06g2657	1810	100	1488	1	463	463	956	0	461/463	99	XP_015579416.1	LOW QUALITY PROTEIN: 3-ketoacyl-CoA synthase 19-like [Ricinus communis]	29690.m000413
RcuChr06m2666	RcuChr06g2666	1645	31	1395	1	455	455	936	0	455/455	100	XP_002526783.1	3-ketoacyl-CoA synthase 19 [Ricinus communis] EEF35589.1 acyltransferase, putative [Ricinus communis]	29690.m000412
RcuChr08m1943	RcuChr08g1943	2328	510	1934	1	475	475	947	0	475/475	100	XP_002534162.1	3-ketoacyl-CoA synthase 12 [Ricinus communis] EEF28222.1 acyltransferase, putative [Ricinus communis]	30012.m000041
RcuChr09m0305	RcuChr09g0305	2083	698	2080	1	461	461	964	0	461/461	100	XP_002516940.1	probable 3-ketoacyl-CoA synthase 21 [Ricinus communis] EEF45554.1 acyltransferase, putative [Ricinus communis]	29726.m004062
RcuChr09m0623	RcuChr09g0623	2060	74	1804	13	518	520	679	0	342/577	59	XP_011027418.1	PREDICTED: 3-ketoacyl-CoA synthase 11-like [Populus euphratica]	29844.m003187	29844.m003188
RcuChr09m0624	RcuChr09g0624	3163	589	1377	1	263	526	539	3e-178	263/263	100	XP_002517035.1	3-ketoacyl-CoA synthase 11 [Ricinus communis] EEF45198.1 acyltransferase, putative [Ricinus communis]	29844.m003186
RcuChr09m0856	RcuChr09g0856	3700	975	1106	84	127	463	80.9	1e-88	36/44	82	AER42339.1	3-ketoacyl-CoA thiolase [Arachis hypogaea]	29904.m002984	30204.m001789	32910.m000028	56654.m000014
#RcuChr03m1769	RcuChr03g1769	5279	1333	1548	124	195	493	130	8e-56	63/72	88	PNT31572.1	hypothetical protein POPTR_006G138000v3 [Populus trichocarpa]	29739.m003711	39251.m000023
RcuChr07m3048	RcuChr07g3048	6552	4586	5083	1	166	184	340	9e-104	166/166	100	XP_002514824.1	uncharacterized protein LOC8274266 [Ricinus communis] EEF47378.1 conserved hypothetical protein [Ricinus communis]	29929.m004560
#RcuChr08m1698	RcuChr08g1698	5234	4253	4726	452	609	609	324	1e-92	157/158	99	NP_001310647.1	putative phospholipid:diacylglycerol acyltransferase 2 precursor [Ricinus communis] AEJ32007.1 phospholipid:diacylglycerol acyltransferase 2 [Ricinus communis] AEW99983.1 phospholipid:diacylglycerol acyltransferase [Ricinus communis]	29991.m000626
